# Supplementary material for: A multi‐omic study reveals BTG2 as a reliable prognostic marker for early‐stage non‐small cell lung cancer
Source: PubMed Central journal article supplement (PMC5983115; doi:10.1002/1878-0261.12204), 2018-05-04
Supplement: MOL2-12-913-s001.pdf [file MOL2-12-913-s001.pdf]

## **A multi-omic study reveals *BTG2* as a reliable prognostic marker for early-stage non-small cell lung cancer**

### **Supporting information**

#### ***DNA methylation profiles***

Genome-wide DNA methylation data from each cohort was profiled using Illumina Infinium HumanMethylation450 BeadChip Assay. Raw data were processed using R package *minfi* version 1.22.0 (1). Background subtraction, quantile normalization, and quality control were performed subsequently. Low-quality probes were removed if they met the following criteria: (i) failed detection ( $P > 0.05$ ) in  $\geq 5\%$  samples; (ii) coefficient of variance (CV)  $< 5\%$ ; (iii) methylated or unmethylated in all samples; (iv) single nucleotide polymorphisms (SNPs) located in the assayed CpG dinucleotide (2). Samples with  $> 5\%$  undetectable probes also were excluded. BMIQ normalization was used for further type I and II probe correction (3). Further, ComBat (4) was used to adjust batch effects among different cohorts using R package *sva*.

#### ***Gene expression profiles***

**Harvard** The mRNA expression data were available from a subset of NSCLC patients. We used the Whole-Genome DASL HT Assay to get the gene expression values. Expression of all genes was normalized using dChip software before analysis.

**Norway** A subset of LUAD samples had both methylation and mRNA expression data available. The mRNA expression analysis was assessed using

gene expression microarrays from Agilent technologies (SurePrint G3 human GE, 8 x 60 K). The gene expression data was log 2 transformed and normalized between arrays by using the 75th percentile method in Genespring GX analysis Software v.12.1 (Agilent technology).

**Sweden** Gene expression analysis was performed on 117 tumors using Illumina Human HT-12 V4 microarrays. 97 cases had both methylation and expression data. Gene expression data were quantile normalized and mean-centered for each probe across all samples. Probe sets without signal intensity above the median of negative control intensity signals in at least 80% of samples were excluded from analysis.

**GDC** GDC RNA sequencing (RNA-Seq) data preprocessing were done by the The Cancer Genome Atlas (TCGA) workgroup. Raw counts were normalized using RNA-Sequencing by Expectation Maximization (RSEM). Level-3 (gene level) gene quantification data were downloaded from GDC data portal and were further checked for quality. Expression of all genes was extracted and quantile normalized before analysis.

**17 public datasets** We collected 17 public datasets of early-stage NSCLC from the Gene Expression Omnibus (GEO) database. Due the mRNA platforms were different, the expression values were dichotomized into high-expression and low-expression with a cutoff of median value from each cohort.

## **Reference**

1. Aryee MJ. Minfi: a flexible and comprehensive Bioconductor package for the analysis of Infinium DNA methylation microarrays. *Bioinformatics*. 2014;30(10):1363-9.
2. Sandoval J, Mendezgonzalez J, Nadal E, Chen G, Carmona FJ, Sayols S, et al. A prognostic DNA methylation signature for stage I non-small-cell lung cancer. *Journal of Clinical Oncology Official Journal of the American Society of Clinical Oncology*. 2013;31(32):4140-7.
3. Teschendorff AE, Marabita F, Lechner M, Bartlett T, Tegner J, Gomez-Cabrero D, et al. A beta-mixture quantile normalization method for correcting probe design bias in Illumina Infinium 450 k DNA methylation data. *Bioinformatics*. 2013;29(2):189-96.
4. Johnson WE, Li C, Rabinovic A. Adjusting batch effects in microarray expression data using empirical Bayes methods. *Biostatistics*. 2007;8(1):118-27.

## Supplementary Tables and Figures

**Table S1. Annotation for 13 CpG sites located in *BTG2* gene region**

| CpG site   | CHR | Position  | UCSC_RefGene_Group | Relation_to_UCSC_CpG_Island | Included in the prognostic model |
|------------|-----|-----------|--------------------|-----------------------------|----------------------------------|
| cg20138067 | 1   | 203273571 | TSS1500            | N_Shore                     | No                               |
| cg00567854 | 1   | 203273693 | TSS1500            | N_Shore                     | No                               |
| cg00860712 | 1   | 203274134 | TSS1500            | N_Shore                     | No                               |
| cg12586428 | 1   | 203274421 | TSS1500            | Island                      | No                               |
| cg11386686 | 1   | 203274497 | TSS200             | Island                      | No                               |
| cg17083411 | 1   | 203274503 | TSS200             | Island                      | No                               |
| cg10935550 | 1   | 203274660 | TSS200             | Island                      | No                               |
| cg13556604 | 1   | 203274688 | 5'UTR;1stExon      | Island                      | No                               |
| cg24337809 | 1   | 203274882 | Body               | Island                      | No                               |
| cg02299360 | 1   | 203275326 | Body               | Island                      | No                               |
| cg23371584 | 1   | 203275927 | Body               | S_Shore                     | Yes                              |
| cg01798157 | 1   | 203276595 | 3'UTR              | S_Shore                     | Yes                              |
| cg06373167 | 1   | 203278044 | 3'UTR              | S_Shelf                     | Yes                              |

Genome build version: GRCh37/hg19.

**Table S2. Study characteristics of the 17 public lung cancer datasets**

| Study ID | Study description                                                                                                                         | Platform                                                  | Probe name  | URL                                                                                                                                   |
|----------|-------------------------------------------------------------------------------------------------------------------------------------------|-----------------------------------------------------------|-------------|---------------------------------------------------------------------------------------------------------------------------------------|
| GSE14814 | Prognostic and predictive gene signature for adjuvant chemotherapy in resected non-small-cell lung cancer                                 | Affymetrix Human Genome U133A Array                       | 201236_s_at | <a href="https://www.ncbi.nlm.nih.gov/geo/query/acc.cgi?acc=GSE14814">https://www.ncbi.nlm.nih.gov/geo/query/acc.cgi?acc=GSE14814</a> |
| GSE4573  | Gene expression signatures for predicting prognosis of squamous cell and adenocarcinomas of the lung                                      | Affymetrix Human Genome U133A Array                       | 201236_s_at | <a href="https://www.ncbi.nlm.nih.gov/geo/query/acc.cgi?acc=GSE4573">https://www.ncbi.nlm.nih.gov/geo/query/acc.cgi?acc=GSE4573</a>   |
| GSE68465 | Gene expression-based survival prediction in lung adenocarcinoma: a multi-site, blinded validation study                                  | Affymetrix Human Genome U133A Array                       | 201236_s_at | <a href="https://www.ncbi.nlm.nih.gov/geo/query/acc.cgi?acc=GSE68465">https://www.ncbi.nlm.nih.gov/geo/query/acc.cgi?acc=GSE68465</a> |
| GSE31547 | MSKCC-A Primary Lung Cancer Specimens                                                                                                     | Affymetrix Human Genome U133A Array                       | 201236_s_at | <a href="https://www.ncbi.nlm.nih.gov/geo/query/acc.cgi?acc=GSE31547">https://www.ncbi.nlm.nih.gov/geo/query/acc.cgi?acc=GSE31547</a> |
| GSE37745 | Biomarker discovery in non-small cell lung cancer: integrating gene expression profiling, meta-analysis, and tissue microarray validation | Affymetrix Human Genome U133 Plus 2.0 Array               | 201236_s_at | <a href="https://www.ncbi.nlm.nih.gov/geo/query/acc.cgi?acc=GSE37745">https://www.ncbi.nlm.nih.gov/geo/query/acc.cgi?acc=GSE37745</a> |
| GSE30219 | Ectopic activation of germline and placental genes identifies aggressive metastasis-prone lung cancers                                    | Affymetrix Human Genome U133 Plus 2.0 Array               | 201236_s_at | <a href="https://www.ncbi.nlm.nih.gov/geo/query/acc.cgi?acc=GSE30219">https://www.ncbi.nlm.nih.gov/geo/query/acc.cgi?acc=GSE30219</a> |
| GSE10245 | Gene expression differences between adenocarcinoma and squamous cell carcinoma in human NSCLC                                             | Affymetrix Human Genome U133 Plus 2.0 Array               | 201236_s_at | <a href="https://www.ncbi.nlm.nih.gov/geo/query/acc.cgi?acc=GSE10245">https://www.ncbi.nlm.nih.gov/geo/query/acc.cgi?acc=GSE10245</a> |
| GSE50081 | Validation of a histology-independent prognostic gene signature for early-stage, non-small-cell lung cancer including stage IA patients   | Affymetrix Human Genome U133 Plus 2.0 Array               | 201236_s_at | <a href="https://www.ncbi.nlm.nih.gov/geo/query/acc.cgi?acc=GSE50081">https://www.ncbi.nlm.nih.gov/geo/query/acc.cgi?acc=GSE50081</a> |
| GSE31210 | Identification of genes upregulated in ALK-positive and EGFR/KRAS/ALK-negative lung adenocarcinomas                                       | Affymetrix Human Genome U133 Plus 2.0 Array               | 201236_s_at | <a href="https://www.ncbi.nlm.nih.gov/geo/query/acc.cgi?acc=GSE31210">https://www.ncbi.nlm.nih.gov/geo/query/acc.cgi?acc=GSE31210</a> |
| GSE29013 | Robust gene expression signature from formalin-fixed paraffin-embedded samples predicts prognosis of non-small-cell lung cancer patients  | Affymetrix Human Genome U133 Plus 2.0 Array               | 201236_s_at | <a href="https://www.ncbi.nlm.nih.gov/geo/query/acc.cgi?acc=GSE29013">https://www.ncbi.nlm.nih.gov/geo/query/acc.cgi?acc=GSE29013</a> |
| GSE11969 | Expression Profile-Defined Classification of Lung Adenocarcinoma                                                                          | Agilent Homo sapiens 21.6K custom array                   | A_23_P62901 | <a href="https://www.ncbi.nlm.nih.gov/geo/query/acc.cgi?acc=GSE11969">https://www.ncbi.nlm.nih.gov/geo/query/acc.cgi?acc=GSE11969</a> |
| GSE13213 | Relapse-related molecular signature in lung adenocarcinomas identifies patients with dismal prognosis                                     | Agilent-014850 Whole Human Genome Microarray 4x44K G4112F | A_23_P62901 | <a href="https://www.ncbi.nlm.nih.gov/geo/query/acc.cgi?acc=GSE13213">https://www.ncbi.nlm.nih.gov/geo/query/acc.cgi?acc=GSE13213</a> |

|          |                                                                                                                 |                                             |                      |                                                                                                                                       |
|----------|-----------------------------------------------------------------------------------------------------------------|---------------------------------------------|----------------------|---------------------------------------------------------------------------------------------------------------------------------------|
| GSE26939 | Human lung adenocarcinoma mRNA expression and gene mutations                                                    | Agilent-UNC-custom-4X44K                    | NM_006763_2_2<br>532 | <a href="https://www.ncbi.nlm.nih.gov/geo/query/acc.cgi?acc=GSE26939">https://www.ncbi.nlm.nih.gov/geo/query/acc.cgi?acc=GSE26939</a> |
| GSE41271 | Expression profiling of 275 lung cancer specimens                                                               | Illumina HumanWG-6 v3.0 expression beadchip | ILMN_1770085         | <a href="https://www.ncbi.nlm.nih.gov/geo/query/acc.cgi?acc=GSE41271">https://www.ncbi.nlm.nih.gov/geo/query/acc.cgi?acc=GSE41271</a> |
| GSE42127 | Expression data for non-small-cell lung cancer                                                                  | Illumina HumanWG-6 v3.0 expression beadchip | ILMN_1770085         | <a href="https://www.ncbi.nlm.nih.gov/geo/query/acc.cgi?acc=GSE42127">https://www.ncbi.nlm.nih.gov/geo/query/acc.cgi?acc=GSE42127</a> |
| GSE83227 | Classification of human lung carcinomas by mRNA expression profiling reveals distinct adenocarcinoma subclasses | Affymetrix Human Genome U95 Version 2 Array | 36634_at             | <a href="https://www.ncbi.nlm.nih.gov/geo/query/acc.cgi?acc=GSE83227">https://www.ncbi.nlm.nih.gov/geo/query/acc.cgi?acc=GSE83227</a> |
| GSE68571 | Gene-expression profiles predict survival of patients with lung adenocarcinoma                                  | Affymetrix Human Full Length HuGeneFL Array | Y09943_s_at          | <a href="https://www.ncbi.nlm.nih.gov/geo/query/acc.cgi?acc=GSE68571">https://www.ncbi.nlm.nih.gov/geo/query/acc.cgi?acc=GSE68571</a> |

---

**Table S3. Cox regression analysis for the 13 probes in the training set**

| CpG site   | Harvard          |          | Sweden           |          | Spain            |          | Norway           |          | Overall          |          |               |
|------------|------------------|----------|------------------|----------|------------------|----------|------------------|----------|------------------|----------|---------------|
|            | HR (95% CI)      | <i>P</i> | HR (95% CI)      | <i>P</i> | HR (95% CI)      | <i>P</i> | HR (95% CI)      | <i>P</i> | HR (95% CI)      | <i>P</i> | FDR- <i>q</i> |
| cg20138067 | 0.72 (0.51-1.03) | 0.076    | 0.71 (0.42-1.19) | 0.192    | 1.35 (0.91-2)    | 0.136    | 0.53 (0.28-1)    | 0.050    | 0.87 (0.7-1.08)  | 0.209    | 0.453         |
| cg00567854 | 0.78 (0.54-1.11) | 0.162    | 0.71 (0.42-1.2)  | 0.201    | 1.26 (0.85-1.87) | 0.240    | 0.57 (0.3-1.06)  | 0.077    | 0.88 (0.71-1.1)  | 0.254    | 0.472         |
| cg00860712 | 0.99 (0.69-1.42) | 0.966    | 0.95 (0.56-1.59) | 0.836    | 1.03 (0.7-1.53)  | 0.873    | 1.69 (0.91-3.14) | 0.094    | 1.04 (0.83-1.29) | 0.732    | 0.793         |
| cg12586428 | 1.18 (0.83-1.68) | 0.364    | 0.77 (0.45-1.29) | 0.314    | 1.54 (1.04-2.29) | 0.032    | 1.67 (0.9-3.11)  | 0.104    | 1.08 (0.86-1.34) | 0.515    | 0.644         |
| cg11386686 | 1.48 (1.03-2.12) | 0.033    | 1.2 (0.72-2.01)  | 0.491    | 1.15 (0.78-1.7)  | 0.478    | 1.11 (0.61-2.04) | 0.734    | 0.93 (0.74-1.17) | 0.545    | 0.644         |
| cg17083411 | 0.96 (0.67-1.37) | 0.811    | 0.66 (0.39-1.12) | 0.123    | 1.32 (0.89-1.95) | 0.163    | 1.03 (0.56-1.88) | 0.934    | 0.99 (0.79-1.23) | 0.920    | 0.920         |
| cg10935550 | 1 (0.7-1.42)     | 0.987    | 1.12 (0.67-1.89) | 0.665    | 1.57 (1.06-2.34) | 0.024    | 1.17 (0.64-2.15) | 0.602    | 1.09 (0.87-1.36) | 0.455    | 0.644         |
| cg13556604 | 0.81 (0.57-1.16) | 0.256    | 1.03 (0.61-1.72) | 0.915    | 1.18 (0.8-1.74)  | 0.407    | 0.78 (0.42-1.44) | 0.424    | 0.8 (0.64-0.99)  | 0.043    | 0.141         |
| cg24337809 | 1.44 (1.01-2.06) | 0.045    | 0.82 (0.49-1.38) | 0.455    | 1.16 (0.79-1.72) | 0.455    | 1.13 (0.62-2.09) | 0.683    | 1.1 (0.88-1.37)  | 0.406    | 0.644         |
| cg02299360 | 0.99 (0.69-1.41) | 0.945    | 0.85 (0.5-1.42)  | 0.529    | 1.78 (1.2-2.65)  | 0.004    | 1.24 (0.68-2.28) | 0.483    | 1.19 (0.95-1.48) | 0.128    | 0.333         |
| cg23371584 | 1.41 (0.98-2.01) | 0.061    | 1.79 (1.05-3.05) | 0.031    | 1.75 (1.18-2.6)  | 0.006    | 1.35 (0.73-2.49) | 0.333    | 1.58 (1.27-1.97) | <0.001   | <0.001        |
| cg01798157 | 1.22 (0.85-1.74) | 0.275    | 2.42 (1.4-4.18)  | 0.001    | 1.31 (0.89-1.94) | 0.175    | 1.64 (0.88-3.05) | 0.117    | 1.49 (1.19-1.85) | <0.001   | 0.002         |
| cg06373167 | 0.81 (0.57-1.16) | 0.248    | 2.16 (1.26-3.7)  | 0.005    | 1.39 (0.94-2.06) | 0.097    | 1.38 (0.75-2.55) | 0.299    | 1.31 (1.05-1.63) | 0.001    | 0.043         |

Each probe was categorized into high- and low-methylated by the median value within each cohort.

**Table S4. Differential analysis between tumor and adjacent normal tissues for the 13 probes**

| CpG site   | Beta value (tumor) | Beta value (normal) | Fold change | <i>P</i> | FDR- <i>q</i> | Trend |
|------------|--------------------|---------------------|-------------|----------|---------------|-------|
| cg20138067 | 0.600              | 0.637               | 0.942       | 1.19E-02 | 2.21E-02      | Down  |
| cg00567854 | 0.719              | 0.689               | 1.043       | 8.82E-02 | 1.27E-01      | None  |
| cg00860712 | 0.233              | 0.318               | 0.732       | 1.82E-07 | 2.37E-06      | Down  |
| cg12586428 | 0.004              | 0.003               | 1.317       | 1.85E-01 | 2.18E-01      | None  |
| cg11386686 | 0.006              | 0.005               | 1.129       | 6.26E-01 | 6.78E-01      | None  |
| cg17083411 | 0.233              | 0.264               | 0.883       | 7.77E-04 | 2.02E-03      | Down  |
| cg10935550 | 0.014              | 0.010               | 1.450       | 1.05E-03 | 2.27E-03      | Up    |
| cg13556604 | 0.005              | 0.004               | 1.076       | 6.98E-01 | 6.98E-01      | None  |
| cg24337809 | 0.023              | 0.011               | 2.085       | 1.80E-01 | 2.18E-01      | None  |
| cg02299360 | 0.058              | 0.029               | 2.034       | 1.76E-02 | 2.86E-02      | Up    |
| cg23371584 | 0.105              | 0.060               | 1.758       | 5.47E-04 | 1.78E-03      | Up    |
| cg01798157 | 0.358              | 0.197               | 1.819       | 2.59E-05 | 1.12E-04      | Up    |
| cg06373167 | 0.452              | 0.348               | 1.299       | 7.74E-06 | 5.03E-05      | Up    |



**Table S5. Multivariable Cox regression analysis for the methylation prognostic signature**

| Characteristics                    | Harvard          |                       | Sweden           |          | Spain            |                       | Norway           |          | GDC              |          | Overall <sup>a</sup> |                       |
|------------------------------------|------------------|-----------------------|------------------|----------|------------------|-----------------------|------------------|----------|------------------|----------|----------------------|-----------------------|
|                                    | HR (95% CI)      | <i>P</i>              | HR (95% CI)      | <i>P</i> | HR (95% CI)      | <i>P</i>              | HR (95% CI)      | <i>P</i> | HR (95% CI)      | <i>P</i> | HR (95% CI)          | <i>P</i>              |
| Prognostic score (high risk group) | 1.51 (1.04-2.19) | 0.031                 | 2.21 (1.28-3.81) | 0.004    | 2.12 (1.41-3.17) | 2.69×10 <sup>-4</sup> | 2.09 (1.05-4.18) | 0.036    | 1.85 (1.26-2.72) | 0.001    | 1.89 (1.32-2.57)     | 4.94×10 <sup>-6</sup> |
| Age (per year)                     | 1.05 (1.03-1.07) | 1.57×10 <sup>-5</sup> | 1.05 (1.02-1.08) | 0.004    | 0.99 (0.97-1.01) | 0.389                 | 1.01 (0.98-1.05) | 0.546    | 1.03 (1.01-1.05) | 0.001    | 1.02 (1.01-1.03)     | 7.62×10 <sup>-5</sup> |
| Gender (female)                    | 1.02 (0.69-1.5)  | 0.915                 | 0.78 (0.43-1.38) | 0.388    | 1.41 (0.91-2.17) | 0.126                 | 0.78 (0.42-1.45) | 0.429    | 0.79 (0.54-1.15) | 0.220    | 1.00 (0.83-1.22)     | 0.963                 |
| Clinical stage (stage II)          | 2.05 (1.35-3.1)  | 7.10×10 <sup>-4</sup> | 1.07 (0.38-3.06) | 0.892    | 2.93 (1.86-4.6)  | 3.40×10 <sup>-6</sup> | 2.17 (1.17-4.03) | 0.014    | 1.41 (0.98-2.03) | 0.064    | 1.90 (1.56-2.34)     | 2.09×10 <sup>-9</sup> |
| Smoking status (current smoker)    | 1.41 (1.04-1.93) | 0.029                 | 2.24 (0.91-5.54) | 0.080    | 0.91 (0.47-1.76) | 0.783                 | 0.63 (0.24-1.62) | 0.336    | 1 (0.46-2.16)    | 0.993    | 1.31 (0.93-1.83)     | 0.114                 |
| Histology type (LUSC)              | 1.15 (0.78-1.7)  | 0.487                 | 0.87 (0.42-1.77) | 0.692    | 1.37 (0.84-2.23) | 0.201                 | -                | -        | 1.13 (0.78-1.65) | 0.516    | 1.20 (0.96-1.49)     | 0.110                 |

<sup>a</sup>To control the potential heterogeneity caused by different geographic regions, study sites were included as a covariate in the multivariable model.

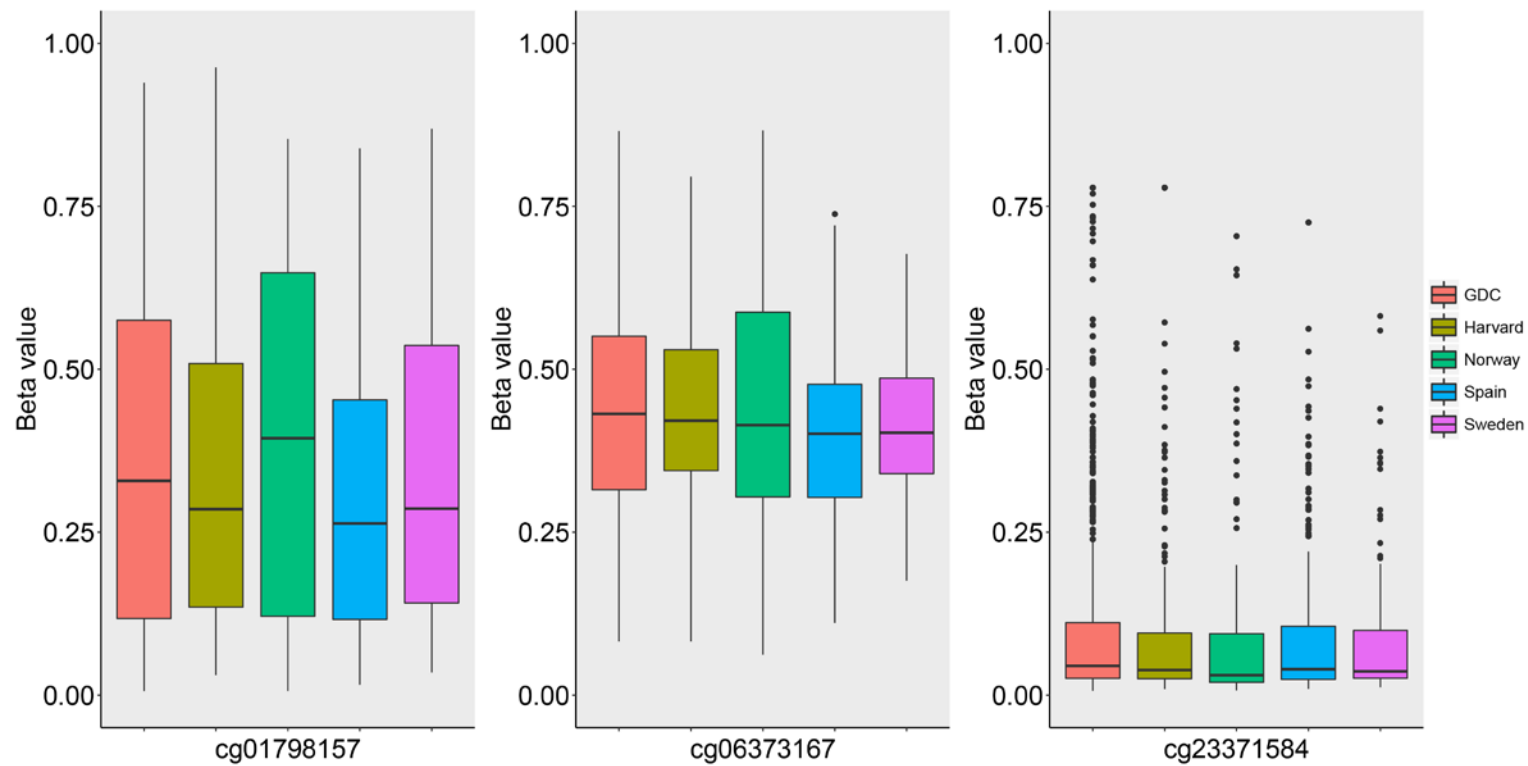

**Figure S1.** Boxplot depicting the distribution of the three CpG probes across the five cohorts. The central rectangle spans the first quartile to the third quartile (the interquartile range or IQR). A segment inside the rectangle shows the median and "whiskers" above and below the box show the locations of the minimum and maximum.

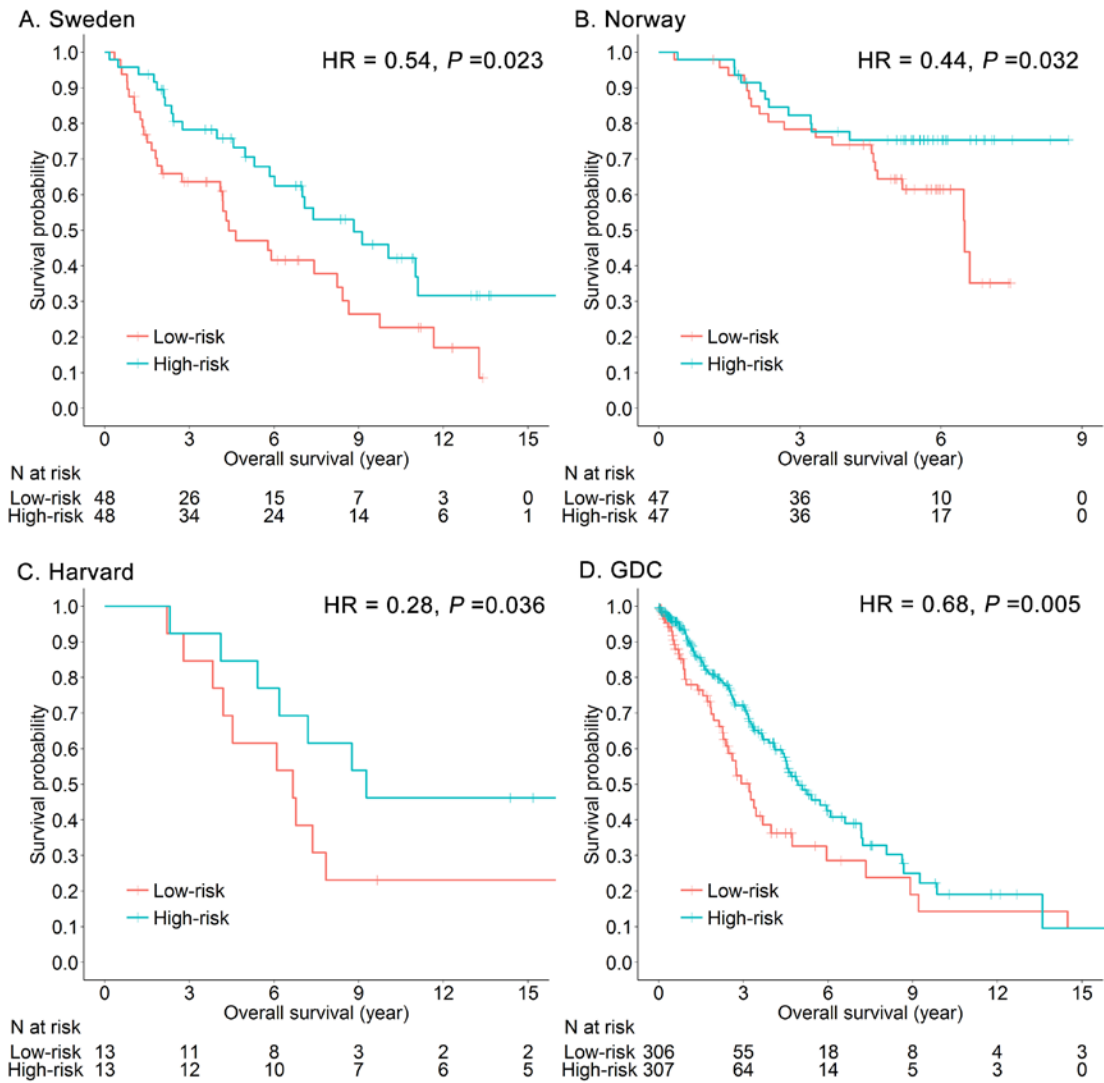

**Figure S2.** (A) Sweden, (B) Norway, (C) Harvard, and (D) GDC. Kaplan-Meier survival analyses for the *BTG2* gene expression in the four cohorts. Patients were categorized into low-risk and high-risk groups using a cutoff value of the median value within each cohort.

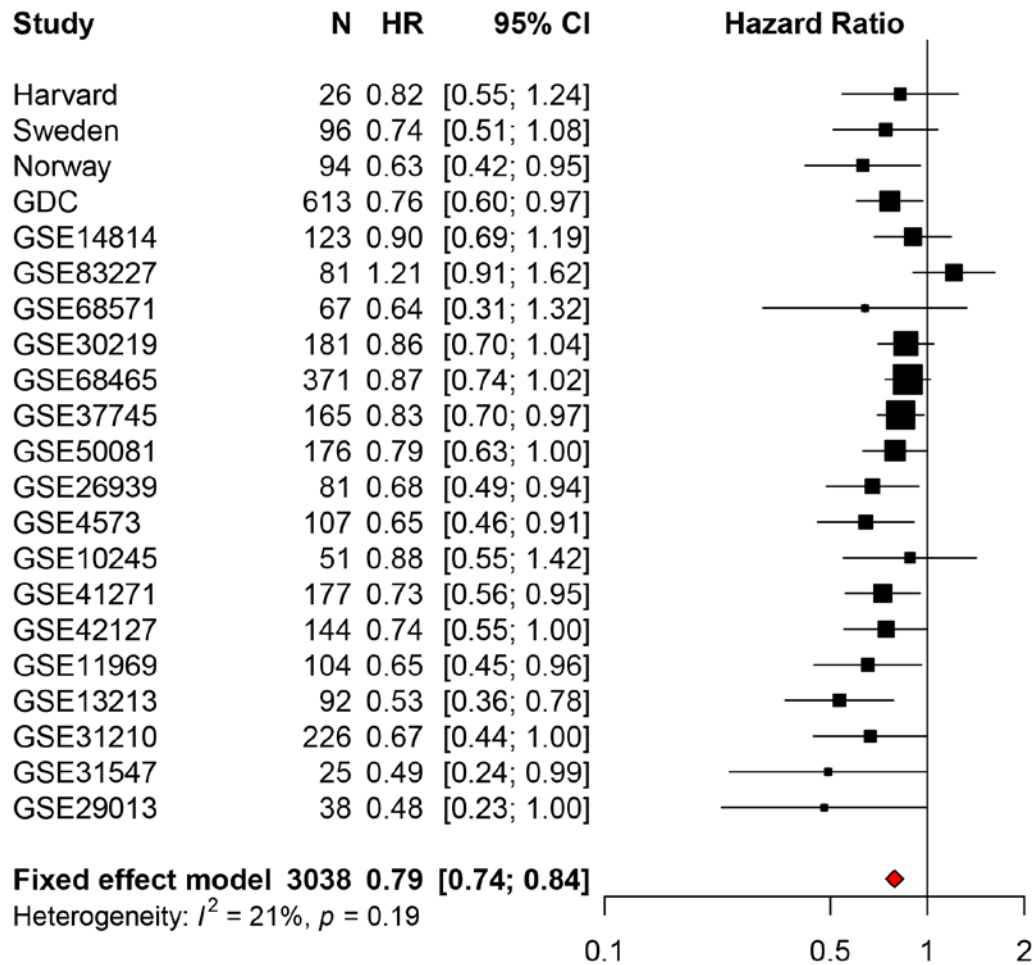

**Figure S3.** Meta-analysis with fix-effect model for the BTG2 expression and early-stage lung cancer survival collected from our cohorts and 17 extended public datasets. The gene expression data of each cohort was normalized with mean = 0 and standard deviation = 1 and included in the univariable Cox regression model.

### A. Methylation model

| Subgroup              | N    | HR   | 95% CI       |
|-----------------------|------|------|--------------|
| Age≤68                | 640  | 1.55 | [1.18; 2.03] |
| Age>68                | 590  | 1.59 | [1.21; 2.08] |
| Male                  | 552  | 1.77 | [1.32; 2.38] |
| Female                | 678  | 1.34 | [1.04; 1.72] |
| LUAD                  | 824  | 1.82 | [1.43; 2.32] |
| LUSC                  | 406  | 1.44 | [1.03; 2.02] |
| Stage I               | 868  | 1.60 | [1.27; 2.02] |
| Stage II              | 362  | 1.54 | [1.10; 2.16] |
| Never                 | 138  | 3.77 | [1.88; 7.55] |
| Current/former        | 1069 | 1.37 | [1.13; 1.66] |
| With adjuvant therapy | 145  | 1.71 | [1.07; 2.73] |
| No adjuvant therapy   | 661  | 1.31 | [1.04; 1.64] |

### Hazard Ratio

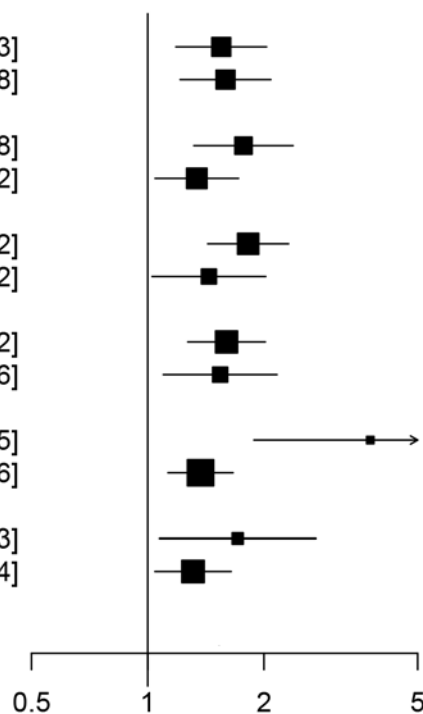

### B. Methylation model

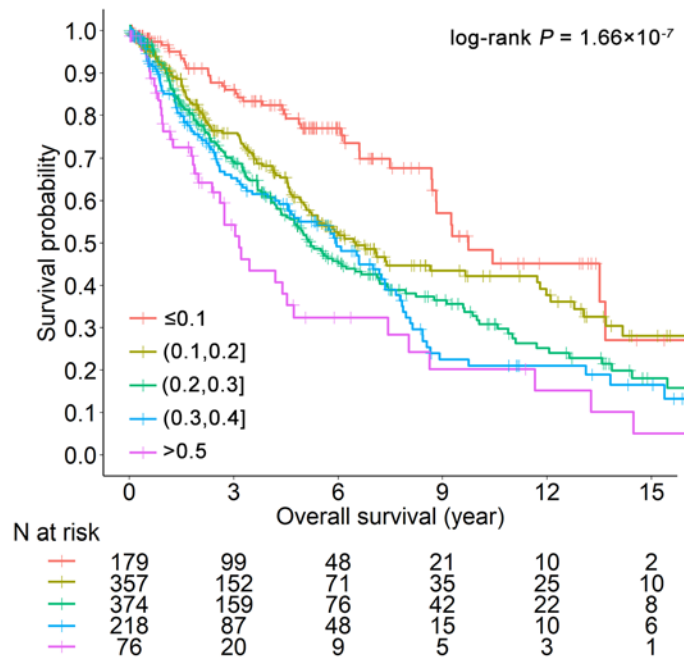

**Figure S4.** (A) Stratification analysis for prognostic signature based on methylation model. (B). Kaplan–Meier curves regarding overall survival for respective different score categories in the methylation model.
